# Supplementary material for: CO-releasing Metal Carbonyl Compounds as Antimicrobial Agents in the Post-antibiotic Era
Source: PubMed Central journal article supplement (PMC4521022; doi:10.1074/jbc.r115.642926), 2015-06-08

**SUPPLEMENTARY TABLE 1****CO and CORMs as antimicrobial agents: a comparison**

|                                       | <b>Pros</b>                                                               | <b>Cons</b>                                        |
|---------------------------------------|---------------------------------------------------------------------------|----------------------------------------------------|
| <b>CO gas</b>                         | Stability                                                                 | Ultimately toxic to almost all organisms           |
|                                       | Adequate water solubility                                                 | Low toxicity against bacteria                      |
|                                       | Facile diffusion across membranes                                         | Difficult handling and administration              |
|                                       | Produced intracellularly by heme oxygenases                               |                                                    |
| <b>CORMs (generalized properties)</b> | Toxicity against bacteria (e.g. CORM-2 and CORM-3)                        | Complex chemistry                                  |
|                                       | Easy handling and administration                                          | Lack of knowledge on biological fates              |
|                                       | CO release can be controlled (e.g. PhotoCORMs and enzyme-activated CORMs) | Only some CORMs have been tested microbiologically |
|                                       | New CORMs with desirable therapeutic effects are appearing                |                                                    |

# SUPPLEMENTARY FIGURE 1

## Antibiotics and CORMs have distinct cellular targets

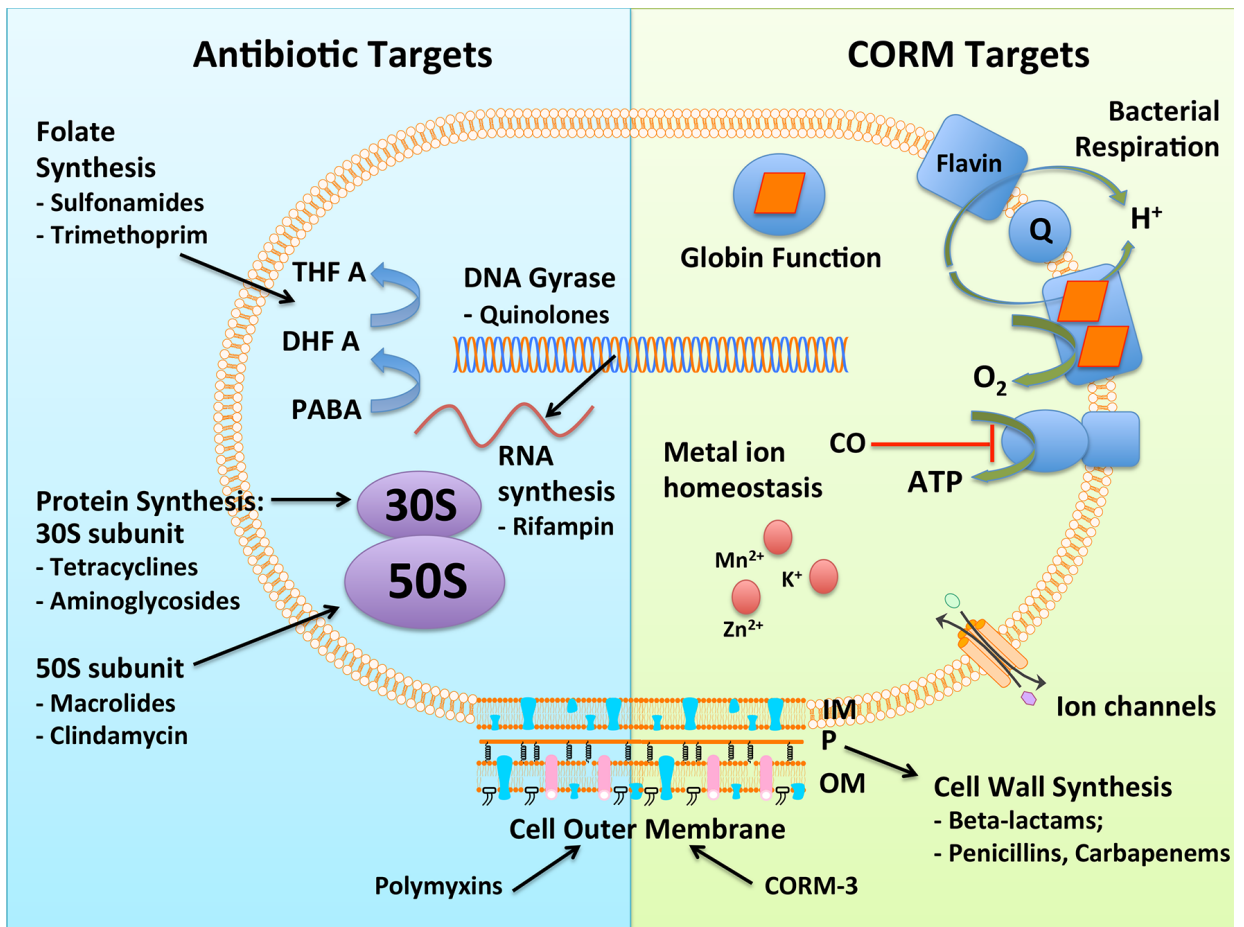

Supplement: supp_R115.642926_jbc.R115.642926-1.pdf [file supp_R115.642926_jbc.R115.642926-1.pdf]
